# Supplementary material for: Cellular and Transcriptional Landscape of Human Hypoplastic Left Heart Syndrome
Source: Research Square preprint supplement (doi:10.21203/rs.3.rs-6689087/v1), 2025-05-29

Endocardium to Fibroblast  
NF

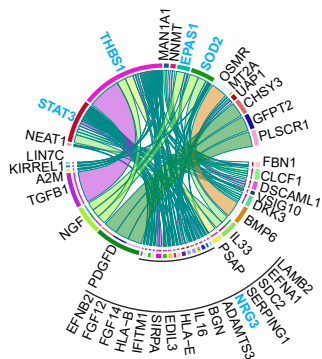

Endocardium to Fibroblast  
SysHF

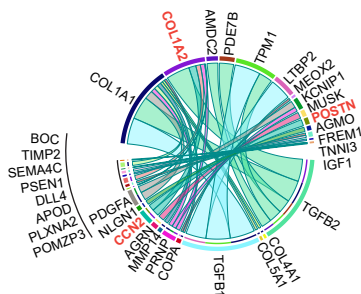

**C** Endocardium to Endocardium  
NF

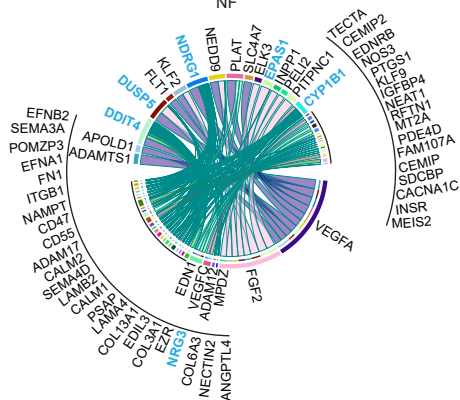

Endocardium to Endocardium  
SysHF

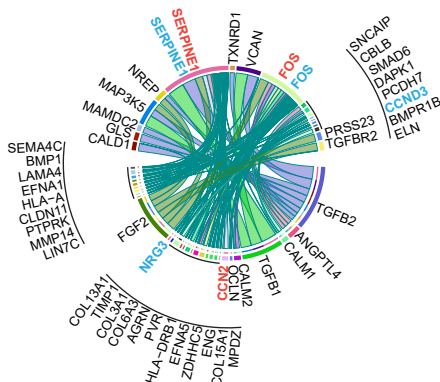

Supplement: Supplementary file 1 [file 57a2e9d1e688e0c575d65782.pdf]
