# Supplementary material for: Cellular and Transcriptional Landscape of Human Hypoplastic Left Heart Syndrome
Source: Research Square preprint supplement (doi:10.21203/rs.3.rs-6689087/v1), 2025-05-29
Supplement: Supplementary file 1 [file b7c597de51a0bccde58b6b63.xlsx]

## Sheet: supplementary table 1
Supplementary Table 1: Clinical Demographic Data
Sample ID	Surgery	Condition	Tissue	Age (year)	Sex
P0156	Donor	Donor	RV	1.3	F
P0318	Donor	Donor	RV	2.87	M
P0172	Donor	Donor	RV	7.4	M
P0202	Donor	Donor	RV	8	F
P0344	Fontan	PLE/PB	RV	7	M
P0219	Fontan	PLE/PB	RV	6.05	F
P0254	Fontan	PLE/PB	RV	4.76	M
T1126	Fontan	PLE/PB	RV	14	M
T1197	Fontan	PLE/PB	RV	16	F
P0116	Fontan	Systolic HF	RV	3.81	M
T1093	Fontan	Systolic HF	RV	4	F
T1007	Fontan	Systolic HF	RV	15	M
P0371	Glenn	Systolic HF	RV	6.7	M
T485	Fontan	Systolic HF	RV	23	M
